# Supplementary material
Source: Springer Nature journal article supplement (https://www.springermedizin.de/resource/supplementary/12885_2013_4487_MOESM4_ESM.pdf/9466474)

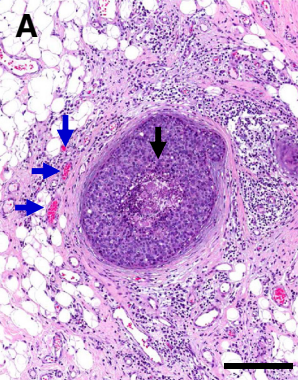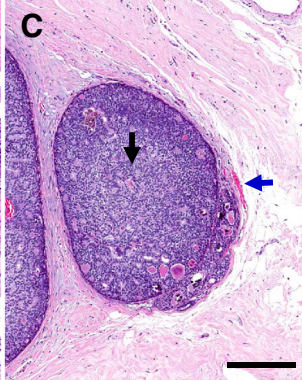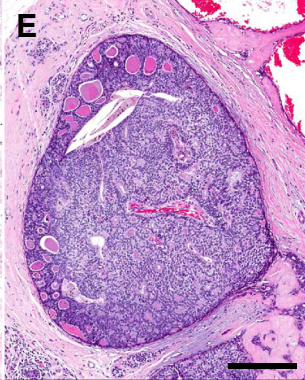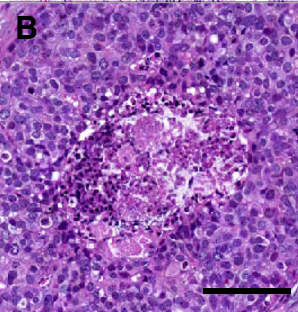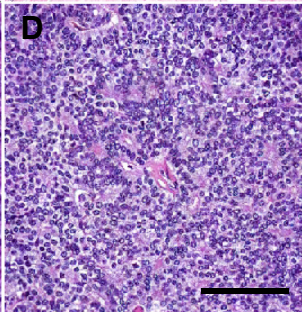

Supplement: MOESM4 [file 9466474]
